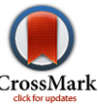

## Correction

# Correction: Increased Iron Sequestration in Alveolar Macrophages in Chronic Obstructive Pulmonary Disease

**The PLOS ONE Staff**

The word “Obstructive” is misspelled in the article title. The correct title is: Increased Iron Sequestration in Alveolar Macrophages in Chronic Obstructive Pulmonary Disease. The correct citation is: Philippot Q, Deslée G, Adair-Kirk TL, Woods JC, Byers D, et al. (2014) Increased Iron Sequestration in Alveolar Macrophages in Chronic Obstructive Pulmonary Disease. PLoS ONE 9(5): e96285. doi:10.1371/journal.pone.0096285

**Reference**

1. Philippot Q, Deslée G, Adair-Kirk TL, Woods JC, Byers D, et al. (2014) Increased Iron Sequestration in Alveolar Macrophages in Chronic Obstructive Pulmonary Disease. PLoS ONE 9(5): e96285. doi:10.1371/journal.pone.0096285

**Citation:** The PLOS ONE Staff (2014) Correction: Increased Iron Sequestration in Alveolar Macrophages in Chronic Obstructive Pulmonary Disease. PLoS ONE 9(7): e104601. doi:10.1371/journal.pone.0104601

**Published:** July 30, 2014

**Copyright:** © 2014 The PLOS ONE Staff. This is an open-access article distributed under the terms of the Creative Commons Attribution License, which permits unrestricted use, distribution, and reproduction in any medium, provided the original author and source are credited.
